# Supplementary material for: Gender Differences in Stress and Upper Respiratory Tract Infections: A Closer Look
Source: Research Square preprint supplement (doi:10.21203/rs.3.rs-5000233/v1), 2024-10-18
Supplement: Supplementary file 1 [file 852c96b30d3523b7252c282d.docx]

Suppl. Table 1. Descriptive analysis of PSS-4 items in both cohorts

| Cohort H | Women, n/N (%)  137/273 (50) | Men, n/N (%)  136/173 (50) | p-value | Effect size (d) |
| --- | --- | --- | --- | --- |
| How often have you felt, that you were unable to control the important things in your life (1) | 2.82 (+/- 0.98) | 2.32 (+/-0.95) | < 0.001 | -0.523 |
| How often have you felt confident about your ability to handle your personal problems? (2) | 2.49 (+/- 0.89) | 2.04 (+/- 0.81) | < 0.001 | -0.535 |
| How often have you felt that things were going your way? (3) | 2.68 (0.87) | 2.25 (0.89) | < 0.001 | -0.484 |
| How often have you felt difficulties were piling up so high that you could not have overcome them? (4) | 2.41 (+/- 1.06) | 1.99 (+/- 1.04) | 0.001 | -0.400 |
| Cohort P | **Women, n/N (%)**  **79/194 (40.5)** | **Men, n/N (%)**  **115/194 (59.5)** | **p-value** | **Effect size (d)** |
| How often have you felt, that you were unable to control the important things in your life (1) | 2.68 (+/- 1.27) | 2.38 (+/-1,22) | 0.107 | -0.243 |
| How often have you felt confident about your ability to handle your personal problems? (2) | 2.16 (+/- 1.02) | 2.1 (+/-1.16) | 0.701 | -0.058 |
| How often have you felt that things were going your way? (3) | 2.57 (+/- 0.97) | 2.43 (+/-1.15) | 0.392 | -0.128 |
| How often have you felt difficulties were piling up so high that you could not have overcome them? (4) | 2.19 (+/- 1.18) | 1.82 (+/- 1.08) | 0.030 | -0.328 |
